# Supplementary material for: High Concordance between Self-Reported Adherence, Treatment Outcome and Satisfaction with Care Using a Nine-Item Health Questionnaire in InfCareHIV
Source: PLoS One. 2016 Jun 16;11(6):e0156916. doi: 10.1371/journal.pone.0156916 (PMC4911158; doi:10.1371/journal.pone.0156916)
Supplement: S1 Fig — (PDF) [file pone.0156916.s001.pdf]

**S1 Fig. Health Questionnaire used in the Swedish National Quality Assurance Registry  
InfCareHIV**

1. How satisfied are you with your physical health?

[illegible]

2. How satisfied are you with your psychological wellbeing

[illegible]

3. How satisfied are you with your sexual life (regardless if you have sex with a partner or on your own)?

[illegible]

**If you are currently taking HIV medication, kindly answer the following questions:**

4a. Do you experience any side effects?

Yes                      No                      If you answered yes, go to question 4b

☐                      ☐

4b.To what extent are you troubled by medical side effects?

| Very<br>Troubled         | Troubled                 | Rather<br>troubled       | Not very<br>troubled     | Not at all<br>troubled   |
|--------------------------|--------------------------|--------------------------|--------------------------|--------------------------|
| <input type="checkbox"/> |

4c. How many doses have you missed in the past seven days?

0                      1-2                      3 or more doses  
☐                      ☐                      ☐

5. Do you feel involved in the planning and realization of your hiv care and treatment?

Never                  Seldom                  Sometimes                  Always

☐                  ☐                  ☐                  ☐

6. How satisfied are you with the quality of care provided at your hiv clinic?

Very Unsatisfied    Unsatisfied    Rather unsatisfied    Rather satisfied    Satisfied    Very satisfied
